# Supplementary material
Source: PubMed Central journal article supplement (PMC5956283)
Supplement: ac8b00985_si_001.pdf [file ac8b00985_si_001.pdf]

## **Visualization of Mycobacterial biomarkers and Tuberculosis drugs by MALDI MS Imaging**

**Landry Blanc<sup>1</sup>, Anne Lenaerts<sup>2</sup>, Véronique Dartois<sup>1,3</sup>, Brendan Prideaux<sup>1</sup> \***

<sup>1</sup> Public Health Research Institute, New Jersey Medical School, Rutgers, The State University of New Jersey, Newark, New Jersey, USA.

<sup>2</sup> Mycobacteria Research Laboratories, Department of Microbiology, Immunology and Pathology, Colorado State University, Fort Collins, Colorado 80523, United States.

<sup>3</sup> Department of Medicine, New Jersey Medical School, Rutgers, The State University of New Jersey, Newark, New Jersey, USA

### **SUPPORTING INFORMATION**

#### **Table of Contents**

**Figure S1 - MALDI-MS images of Ac<sub>1</sub>PIM<sub>2</sub> and Ac<sub>2</sub>PIM<sub>2</sub> localizations within tissue sections taken from three mouse lung biopsies.**

**Figure S2 - MALDI-MS images of individual PIM and PI-TBSA lipids within necrotic mouse lung lesions. Summed ion intensity images are shown in Figure 3 (main text)**

**Figure S3 – MALDI-MS images of PI-TBSA from tissue sections with and washing in 30% methanol.**

**Table S1 - Summary of animal models, infection timepoints and drug dosing schedules for lung tissues analyzed.**

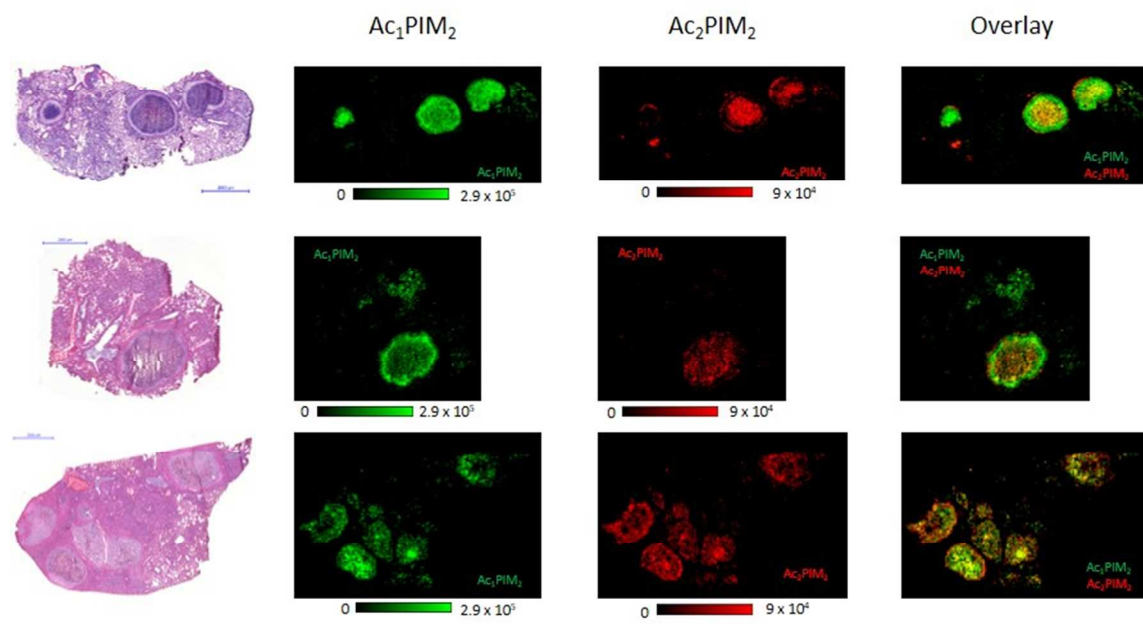

**Figure S1.** Differential distribution of specific PIM species within distinct necrotic mouse granulomas.

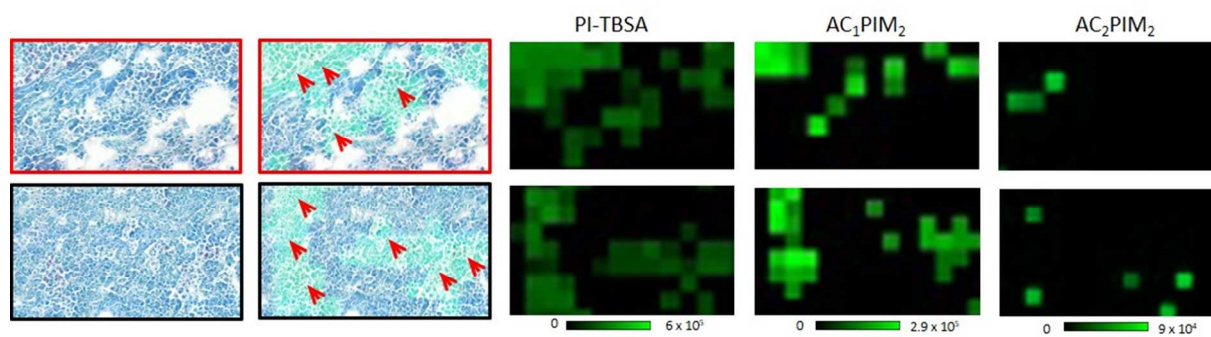

**Figure S2.** MS images showing localization of individual PI-TBSA and PIM lipid ions within necrotic mouse lung lesions shown in Figure 3.

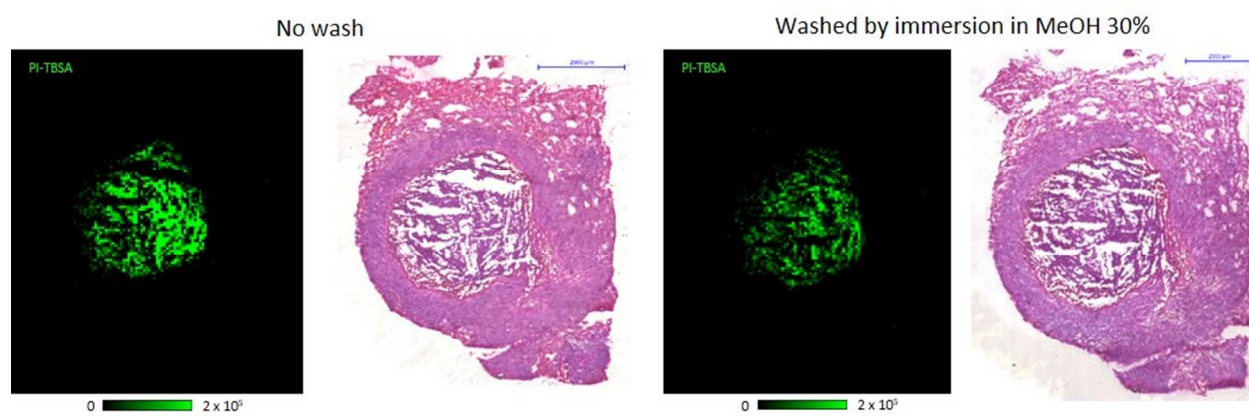

**Figure S3.** PI-TBSA was not observed to delocalize after removal of DHB matrix by immersion in 30% MeOH.

| Animal | Number of animals | Infection time point (wks post-infection) | Drug (concentration mg/kg) | Dosing schedule            | Timepoint post-dose (h) | Corresponding figure in main text |
|--------|-------------------|-------------------------------------------|----------------------------|----------------------------|-------------------------|-----------------------------------|
| Rabbit | 4                 | 16-18                                     | N/A                        | N/A                        | N/A                     | 1, 2                              |
| Rabbit | 3                 | 16-18                                     | Rifampicin (30)            | Steady-state, daily 7-days | 6                       | 5                                 |
| Rabbit | 3                 | 16-18                                     | Rifampicin (30)            | Single                     | 6                       | 5                                 |
| Rabbit | 3                 | 16-18                                     | Moxifloxacin (100)         | Single                     | 12                      | 5                                 |
| Mouse  | 4                 | 8                                         | N/A                        | N/A                        | N/A                     | 3,4                               |

**Table S1.** Summary of animal models, infection timepoints and drug dosing schedules for lung tissues analyzed.
